# Supplementary material for: Transcriptomic Analysis Reveals the Role of tmRNA on Biofilm Formation in Bacillus subtilis
Source: MDPI journal article supplement (doi:10.3390/microorganisms10071338), 2022-07-01
Supplement: s1 [file s1]

# **Transcriptomic analysis reveals the role of tmRNA on biofilm formation in *Bacillus subtilis***

Shanshan Xu <sup>1,2</sup>, Qianqian Cao <sup>1</sup>, Zengzhi Liu<sup>1</sup>, Junpeng Chen <sup>1</sup>, Peiguang Yan <sup>2</sup>, Bingyu Li <sup>3, \*</sup>, Ying Xu <sup>1, \*</sup>

<sup>1</sup> Shenzhen Key Laboratory of Marine Bioresource and Eco-Environmental Science, Shenzhen Engineering Laboratory for Marine Algal Biotechnology, College of Life Sciences and Oceanography, Shenzhen University, Shenzhen 518055, China

<sup>2</sup> College of Physics and Optoelectronic Engineering, Shenzhen University, Shenzhen 518060, China

<sup>3</sup> Guangdong Key Laboratory for Genome Stability and Disease Prevention, Health Science Center, Shenzhen University, Shenzhen, China

\*Correspondence: Ying Xu, [boxuying@szu.edu.cn](mailto:boxuying@szu.edu.cn); Bingyu Li, [byli1988@foxmail.com](mailto:byli1988@foxmail.com)

**Supplementary Materials: Supplementary Figures S1-S11, Supplementary Tables**

**S1-S12.**

**Supplementary Figures**

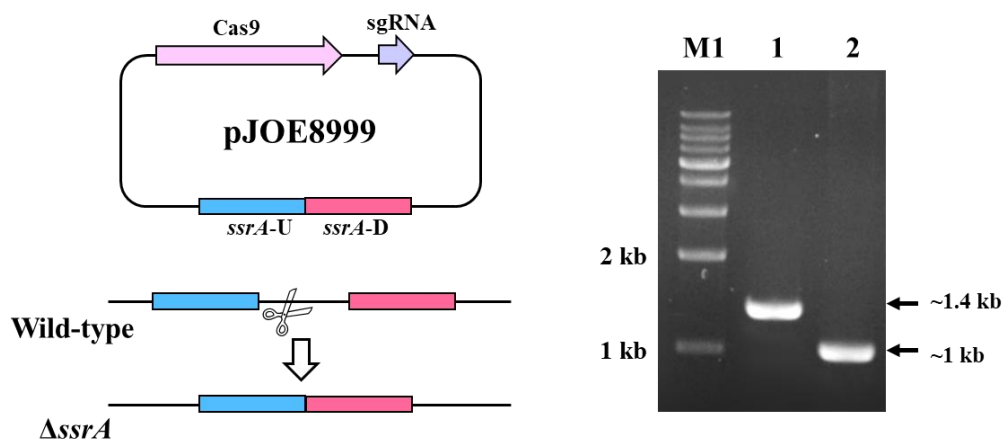

**Supplementary Figure S1. Schematic illustration of the deletion for *ssrA* (left) and PCR validation (right).** Lane M1, 1 kb DNA ladder marker; Lane 1, PCR product amplified from the wild-type strain; Lane 2, PCR product amplified from the  $\Delta ssrA$  strain.

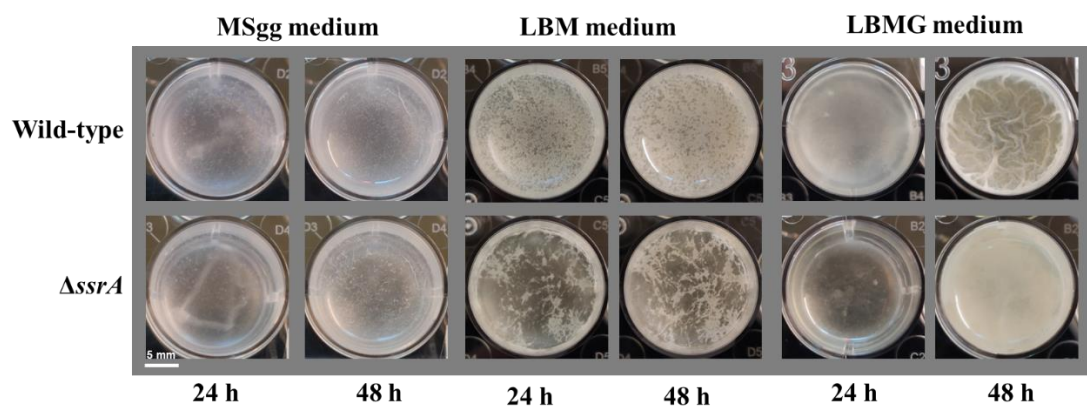

(a)

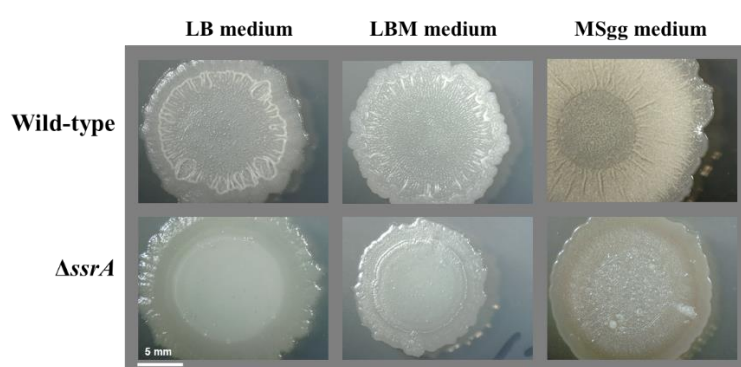

(b)

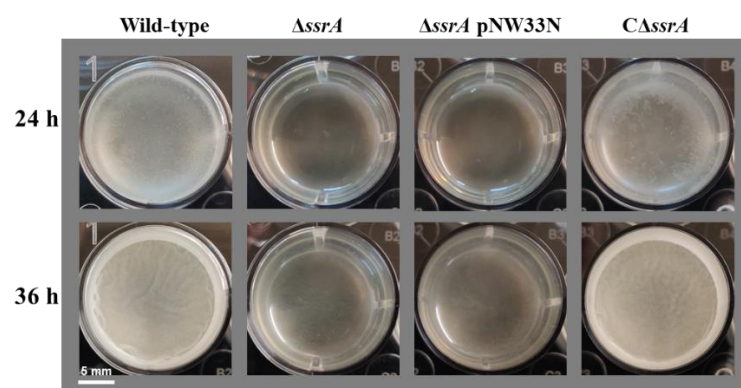

(c)

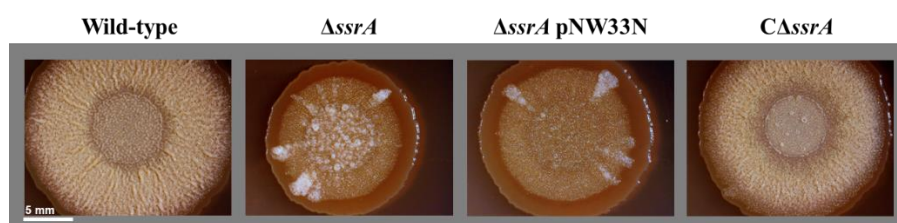

(d)

Supplementary Figure S2. Comparison of the biofilm formation among WT, TM, and  $C\Delta ssrA$ .

**(a)** The wild-type strain (WT) and *ssrA* mutant (TM) were grown in MSgg, LBM and LBMG liquid medium at 30°C and observed for biofilm formation at different times as indicated. The scale bar represents 5 mm. The shown images are the representatives of three independent experiments. **(b)** WT and TM were grown in LB, LBM and MSgg agar plates at 30°C and observed for biofilm formation after 3-day incubation. The scale bar represents 5 mm. The shown images are the representatives of three independent experiments. **(c)** WT, TM, TM/pNW33N, and CΔ*ssrA* (TM/pNW33N-*ssrA*) were grown in the LBMG liquid medium at 30°C and observed for biofilm formation at different times as indicated. The scale bar represents 5 mm. The shown images are the representatives of three independent experiments. **(d)** WT, TM, TM/pNW33N, and CΔ*ssrA* (TM/pNW33N-*ssrA*) were grown in the MSgg agar plates at 30°C for 3 days and observed for biofilm formation. The scale bar represents 5 mm. The shown images are the representatives of three independent experiments.

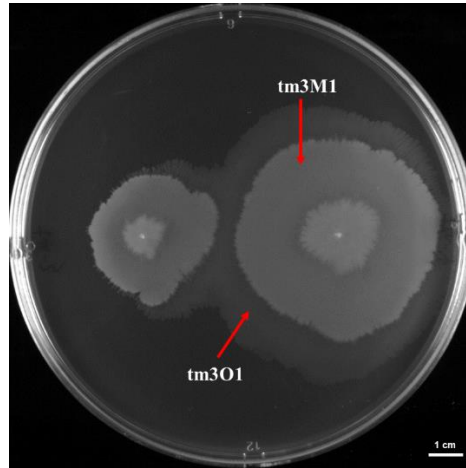

(a)

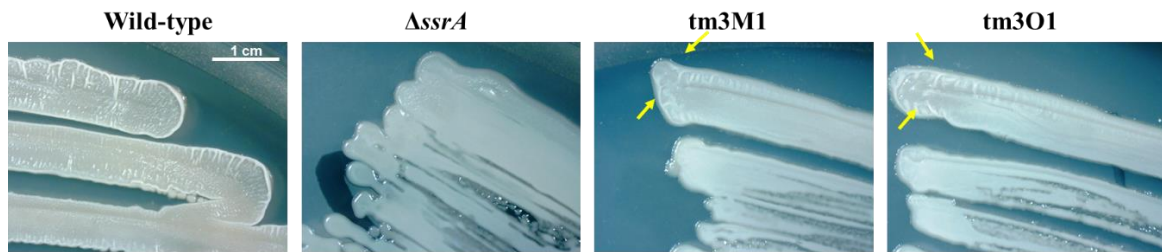

(b)

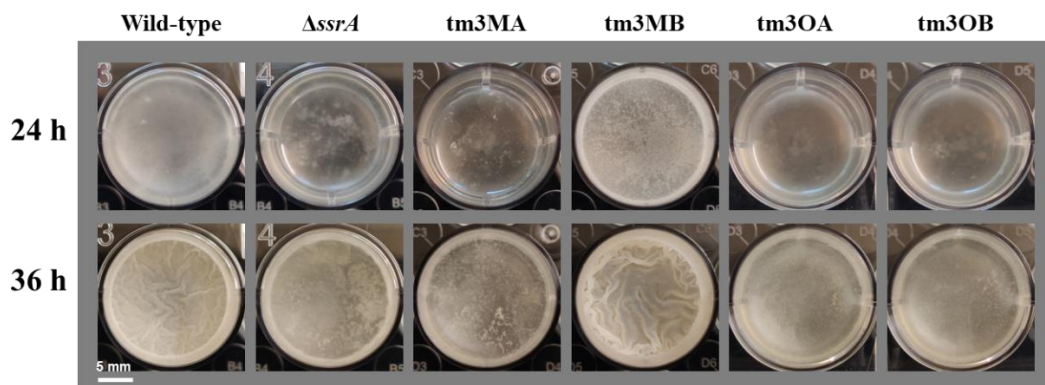

(c)

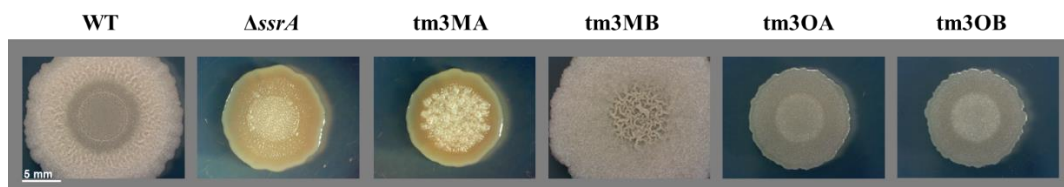

(d)

**Supplementary Figure S3. Isolation of suppressor(s) of *ssrA* and comparison of the biofilm formation among WT, TM, and isolated strains.** (a) To isolate putative swarming suppressors of *ssrA*, TM was grown in soft agar plates until obvious swarming zones appeared. The scale bar represents 1 cm. The red arrows indicated the areas where bacteria were picked for further purification of suppressors. (b)

Bacteria of WT, TM, tm3M1, and tm3O1 were grown in LB agar plates (1.5% agar) for colony-morphology observation. The yellow arrows indicated the wrinkled colony edges of tm3M1 and tm3O1. The scale bar represents 1 cm. **(c)** WT, TM, tm3MA, tm3MB, tm3OA, and tm3OB were grown in the LBMG liquid medium at 30°C and observed for biofilm formation at different times as indicated. The scale bar represents 5 mm. The shown images are the representatives of three independent experiments. tm3MA and tm3MB are strains purified from bacteria of tm3M1. tm3OA and tm3OB are strains purified from bacteria of tm3O1. **(d)** WT, TM, tm3MA, tm3MB, tm3OA, and tm3OB were grown in the MSgg agar plates at 30°C for 3 days and observed for biofilm formation. The scale bar represents 5 mm. The shown images are the representatives of three independent experiments.

(a)

| No. | Sample Name | Concentration(ng/ul) | RIN number |
|-----|-------------|----------------------|------------|
| 1   | WT-1        | 1315                 | 10.00      |
| 2   | WT-2        | 2545                 | 10.00      |
| 3   | WT-3        | 2411                 | 10.00      |
| 4   | TM-1        | 921                  | 9.60       |
| 5   | TM-2        | 1483                 | 9.90       |
| 6   | TM-3        | 1598                 | 9.80       |
| 7   | MB-1        | 942                  | 10.00      |
| 8   | MB-2        | 1844                 | 9.90       |
| 9   | MB-3        | 1005                 | 10.00      |

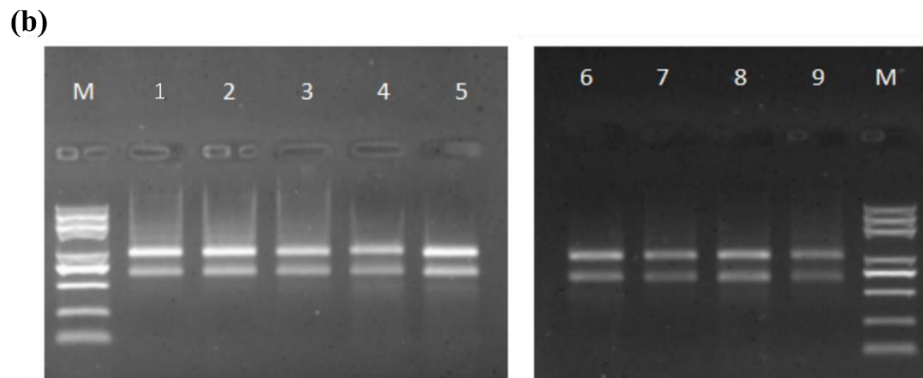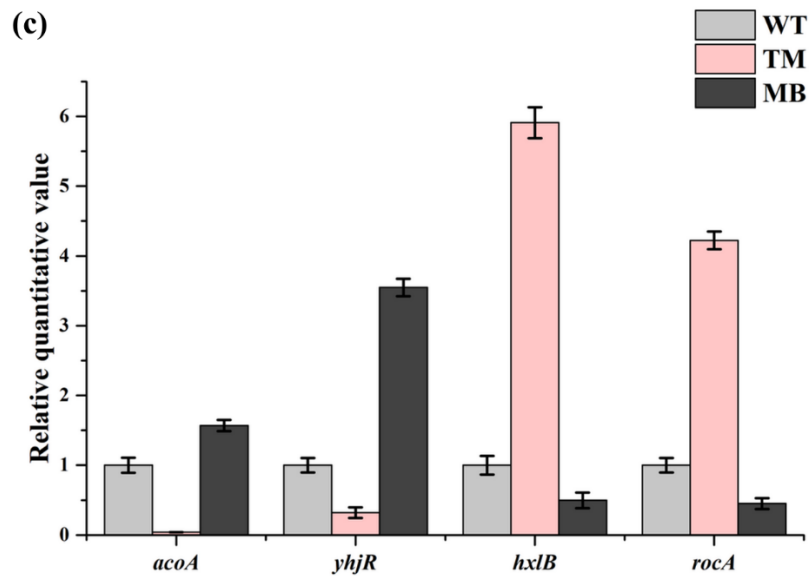

**Supplementary Figure S4.** The quality of the RNA samples and qPCR validation of transcriptome data. (a) The RIN number of the RNA samples. (b) Gel electropherogram of RNA samples. (c) qPCR validation of target genes. The result was consistent with transcriptome data.

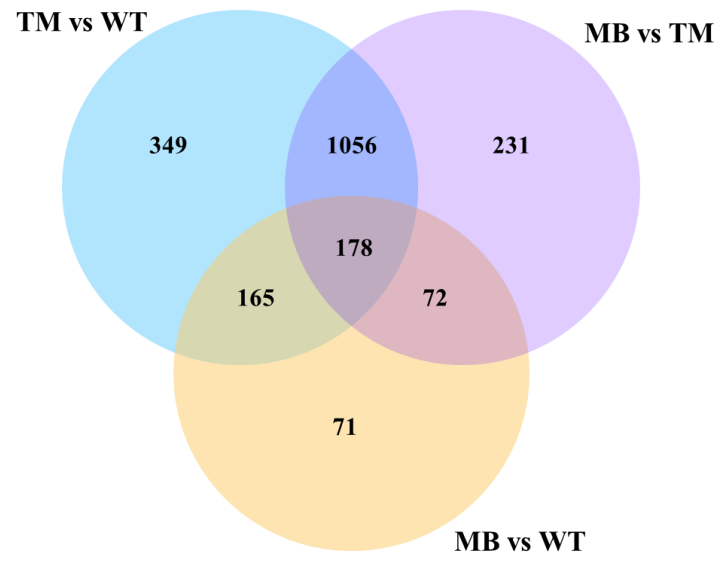

**Supplementary Figure S5. A venn diagram showing the distribution of DEGs in comparisons of WT vs. TM, TM vs. MB, and WT vs. MB.**



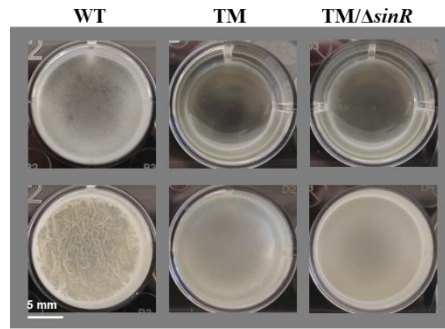

(a)

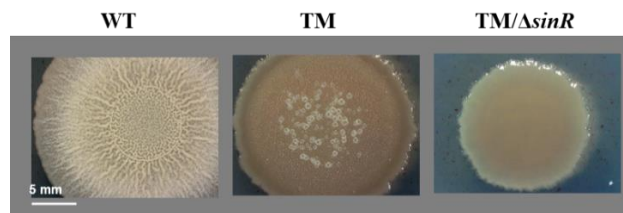

(b)

**Supplementary Figure S6. Comparison of the biofilm formation among WT, TM, and TM/ $\Delta sinR$ .**

**(a)** WT, TM, and TM/ $\Delta sinR$  were grown in the LBMG liquid medium at 30°C and observed for biofilm formation at different times as indicated. The scale bar represents 5 mm. The shown images are the representatives of three independent experiments. **(b)** WT, TM, and TM/ $\Delta sinR$  were grown in the MSgg agar plates at 30°C for 3 days and observed for biofilm formation. The scale bar represents 5 mm. The shown images are the representatives of three independent experiments.

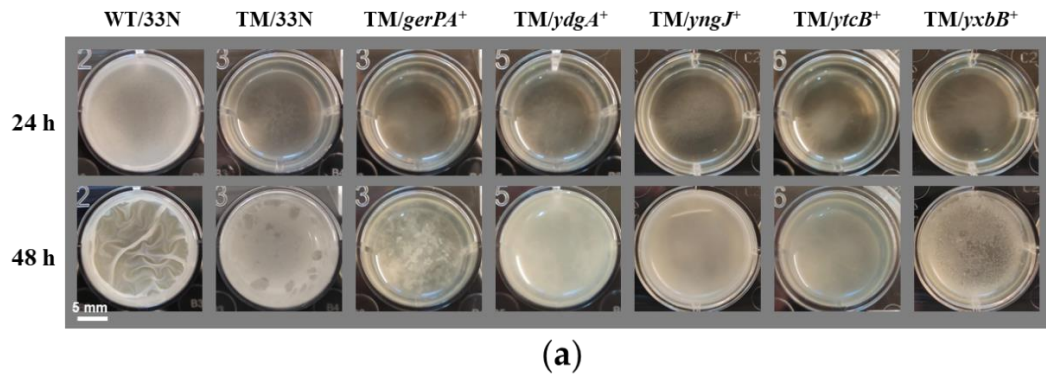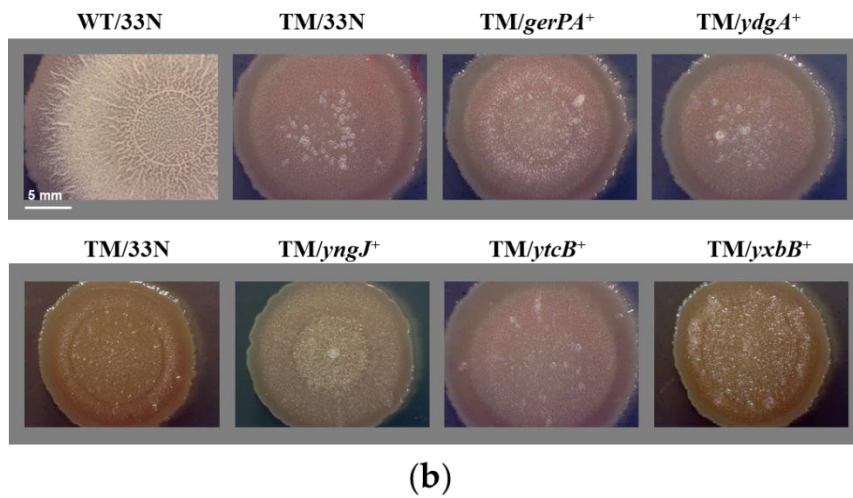

**Supplementary Figure S7. Comparison of the biofilm formation among WT/33N, TM/33N, and overexpression strains. (a)** WT/33N, TM/33N and overexpression strains were grown in the LBMG liquid medium at 30°C and observed for biofilm formation at different times as indicated. The scale bar represents 5 mm. The shown images are the representatives of three independent experiments. **(b)** WT/33N, TM/33N and overexpression strains were grown in the MSgg agar plates at 30°C for 3 days and observed for biofilm formation. The scale bar represents 5 mm. The shown images are the representatives of three independent experiments.

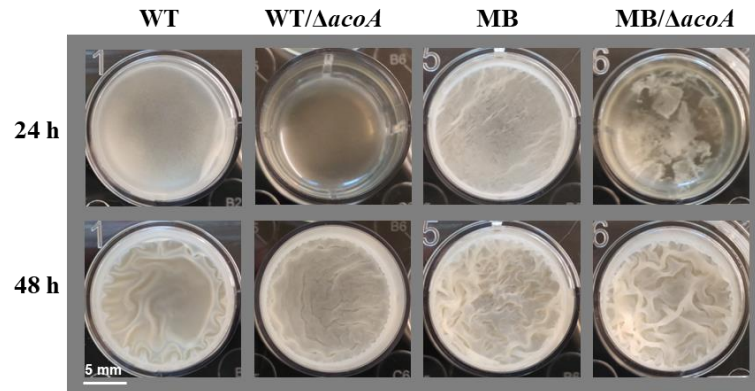

(a)

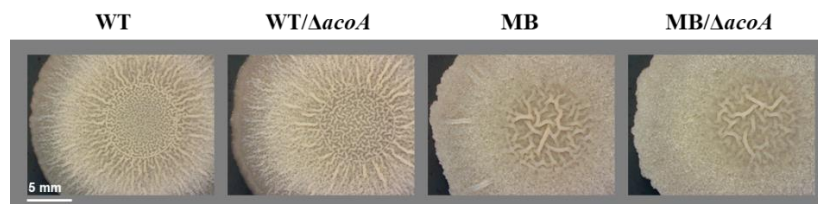

(b)

**Supplementary Figure S8. Comparison of the biofilm formation among WT, WT/ $\Delta$ *acoA*, MB, and MB/ $\Delta$ *acoA*.** (a) WT, WT/ $\Delta$ *acoA*, MB, and MB/ $\Delta$ *acoA* were grown in the LBMG liquid medium at 30°C and observed for biofilm formation at different times as indicated. The scale bar represents 5 mm. The shown images are the representatives of three independent experiments. (b) WT, WT/ $\Delta$ *acoA*, MB, and MB/ $\Delta$ *acoA* were grown in the MSgg agar plates at 30°C for 3 days and observed for biofilm formation. The scale bar represents 5 mm. The shown images are the representatives of three independent experiments.

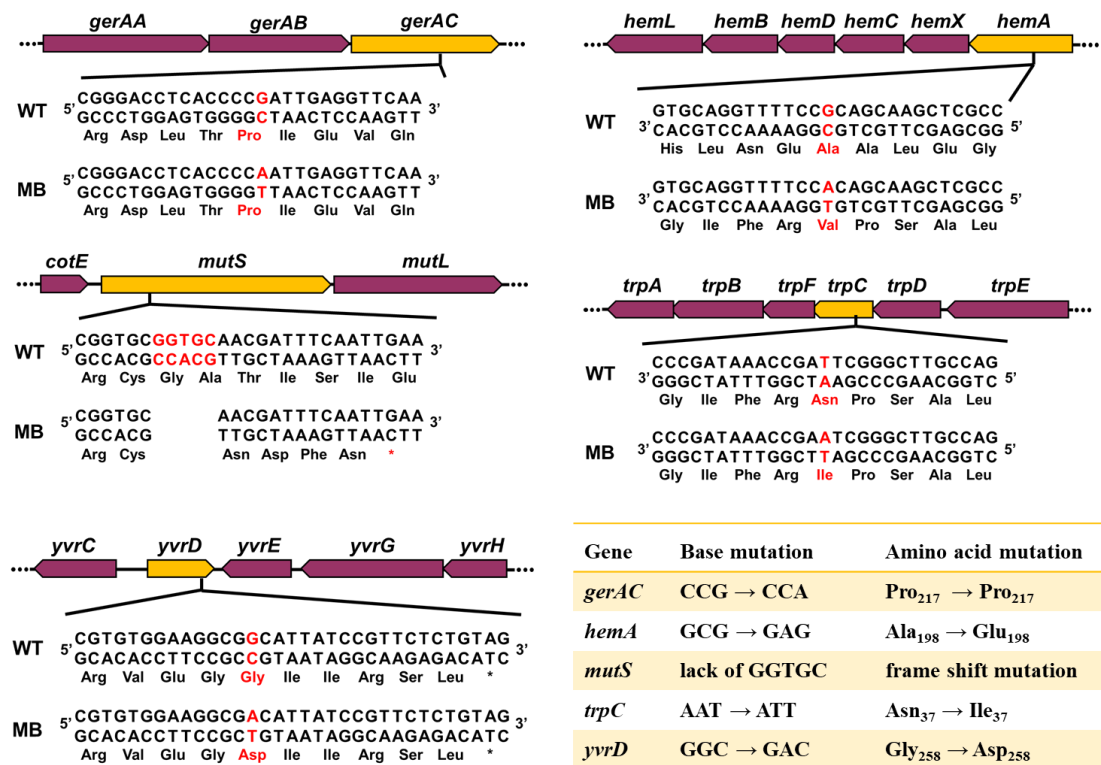

Supplementary Figure S9. Diagrams showing where the suppressor mutations were located and the consequences caused by these mutations in MB.

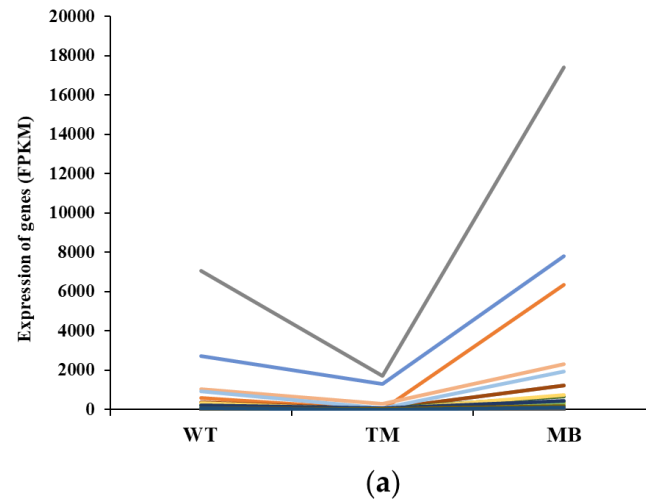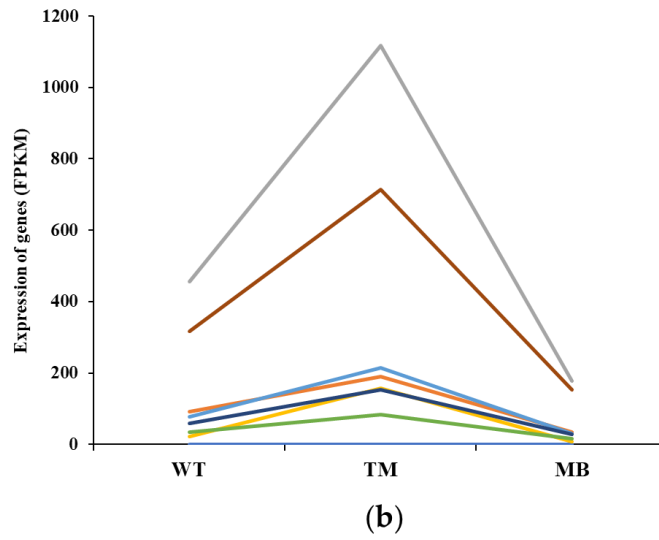

**Supplementary Figure S10. Trend analysis of DEGs.** (a) A chart showing the expression of DEGs with an *acoA*-like pattern in WT, TM, and MB. (b) A chart showing the expression of DEGs with an *acoA*-opposite pattern in WT, TM, and MB.

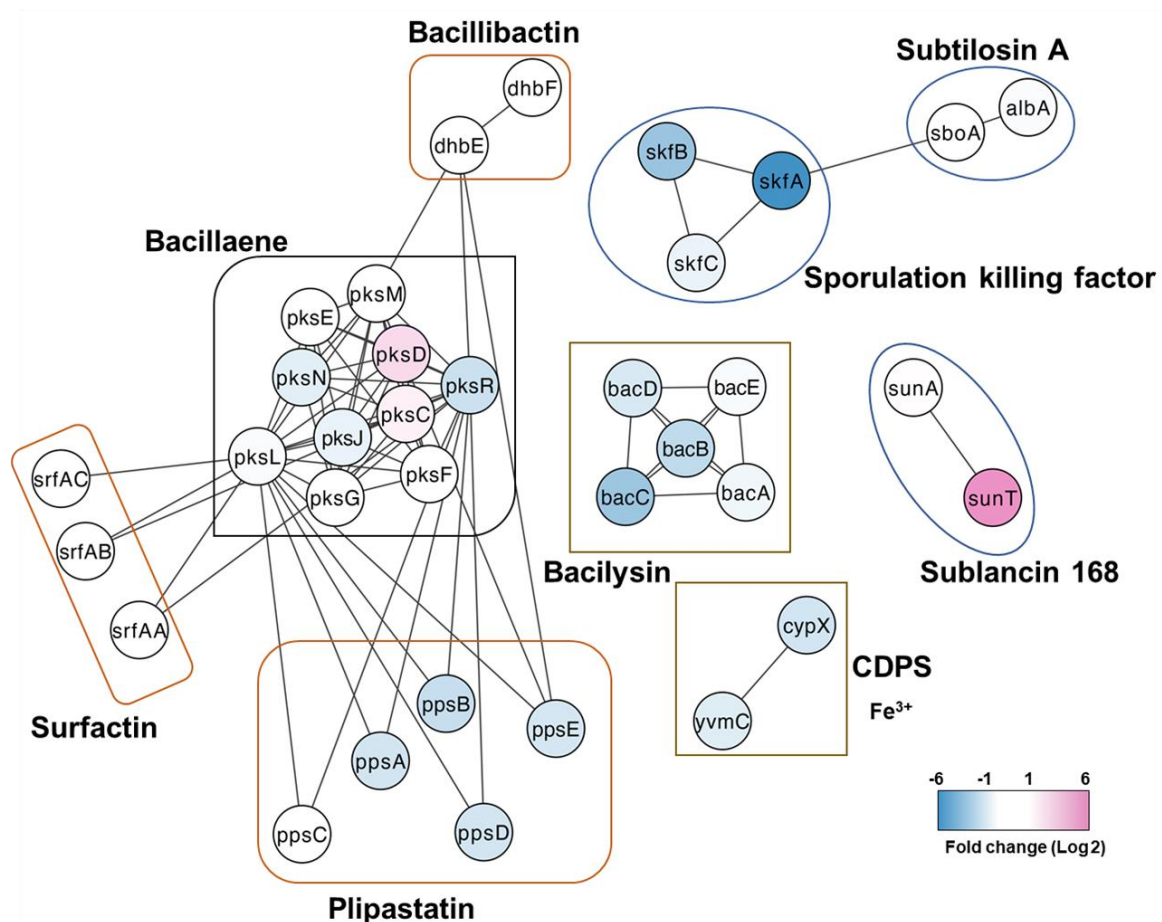

**Supplementary Figure S11. Transcriptome analysis of genes related to compound biosynthesis pathways.** Blue circles represent the down-regulated genes comparing TM with WT, and pink circles represent the up-regulated genes comparing TM with WT. Gene function and biosynthetic gene cluster attribution was confirmed using SubtiWiki database [49]. The protein-protein interaction network diagram was generated by the STRING service (<https://string-db.org/>). The network diagrams were annotated and colored by Cytoscape v3.9.1 [1].

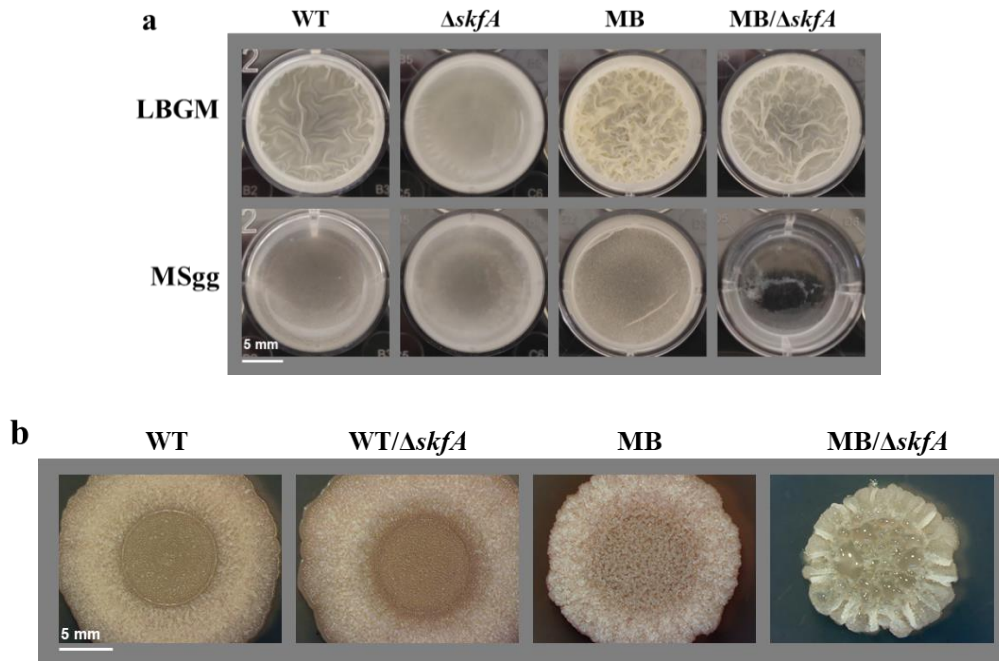

**Supplementary Figure S12: Comparison of the biofilm formation among WT, WT/ $\Delta skfA$ , MB, and MB/ $\Delta skfA$ .** **a** WT, WT/ $\Delta skfA$ , MB, and MB/ $\Delta skfA$  were grown in the LBGM and MSgg liquid media at 30°C and observed for biofilm formation at different times as indicated. The scale bar represents 5 mm. The shown images are the representatives of three independent experiments. **b** WT, WT/ $\Delta skfA$ , MB, and MB/ $\Delta skfA$  were grown in the MSgg agar plates at 30°C for 3 days and observed for biofilm formation. The scale bar represents 5 mm. The shown images are the representatives of three independent experiments.

## Supplementary Tables

**Supplementary Table S1: Strains and plasmids used in This study.**

| Strain name                  | Parent     | Genotype or Characteristic                                                                                                            | Source     |
|------------------------------|------------|---------------------------------------------------------------------------------------------------------------------------------------|------------|
| DH5 $\alpha$                 |            | An <i>E. coli</i> strain for molecular cloning                                                                                        | Lab stock  |
| JM110                        |            | An <i>E. coli</i> strain for modified plasmids for Bacillus transformation, Str <sup>R</sup>                                          | Lab stock  |
| WT                           | 3610       | Wild-type strain                                                                                                                      | Lab stock  |
| TM                           | 3610       | The <i>ssrA</i> -double-crossingover mutant in the 3610 wild-type strain                                                              | This study |
| MB                           | TM         | The biofilm-formation suppressor of <i>ssrA</i>                                                                                       | This study |
| C $\Delta$ <i>ssrA</i>       | TM         | pNW33N::P <sub><i>ssrA</i></sub> - <i>ssrA</i> (pYX202), $\Delta$ <i>ssrA</i> Chl <sup>R</sup> ; the <i>ssrA</i> complementary strain | This study |
| WT/pNW33N                    | 3610       | pNW33N (pYX203), Chl <sup>R</sup> ; as a control for biofilm formation assay                                                          | This study |
| TM/pNW33N                    | TM         | pNW33N (pYX203), Chl <sup>R</sup> ; as a control for biofilm formation assay                                                          | This study |
| TM/ <i>acoA</i> <sup>+</sup> | TM         | pNW33N::pG- <i>acoA</i> (pYX241), $\Delta$ <i>ssrA</i> Chl <sup>R</sup> ; <i>acoA</i> gene overexpression in TM                       | This study |
| TM/ <i>yhjR</i> <sup>+</sup> | TM         | pNW33N:: pG- <i>yhjR</i> (pYX251), $\Delta$ <i>ssrA</i> Chl <sup>R</sup> ; <i>yhjR</i> gene overexpression in TM                      | This study |
| $\Delta$ <i>acoA</i>         | 3610       | The <i>acoA</i> -double-crossingover mutant in WT                                                                                     | This study |
| $\Delta$ <i>yhjR</i>         | 3610       | The <i>yhjR</i> -double-crossingover mutant in WT                                                                                     | This study |
| MB $\Delta$ <i>acoA</i>      | MB         | The <i>acoA</i> -double-crossingover mutant in MB                                                                                     | This study |
| MB $\Delta$ <i>yhjR</i>      | MB         | The <i>yhjR</i> -double-crossingover mutant in MB                                                                                     | This study |
| $\Delta$ <i>skfA</i>         | 3610       | The <i>skfA</i> -double-crossingover mutant in WT                                                                                     | This study |
| MB $\Delta$ <i>skfA</i>      | MB         | The <i>skfA</i> -double-crossingover mutant in MB                                                                                     | This study |
| $\Delta$ <i>sinR</i>         | 3610       | The <i>sinR</i> -double-crossingover mutant in WT                                                                                     | This study |
| TM $\Delta$ <i>sinR</i>      | TM         | The <i>sinR</i> -double-crossingover mutant in MB                                                                                     | This study |
| Plasmid name                 | Background | Genotype or Characteristics                                                                                                           | Source     |



|          |              |                                                                                                                     |                                      |
|----------|--------------|---------------------------------------------------------------------------------------------------------------------|--------------------------------------|
| pJOE8999 | DH5 $\alpha$ | A temperature-sensitive shuttle vector for <i>B. subtilis</i> to knock out genes with Crispr-Cas9, Kan <sup>R</sup> | [34]                                 |
| pYX101   | DH5 $\alpha$ | pJOE8999:: <i>ssrA</i> -gRNA, Kan <sup>R</sup>                                                                      | This study                           |
| pYX102   | DH5 $\alpha$ | pJOE8999:: <i>ssrA</i> -gRNA:: <i>ssrA</i> -UD, Kan <sup>R</sup>                                                    | This study                           |
| pYX103   | JM110        | pJOE8999:: <i>ssrA</i> -gRNA:: <i>ssrA</i> -UD, Kan <sup>R</sup>                                                    | This study                           |
| pNW33N   | DH5 $\alpha$ | <i>E.coli</i> – Gram+ shuttle vector, Chl <sup>R</sup>                                                              | <i>Bacillus</i> Genetic Stock Center |
| pYX201   | DH5 $\alpha$ | pNW33N:: <i>PssrA-ssrA</i> , Chl <sup>R</sup>                                                                       | This study                           |
| pYX202   | JM110        | pNW33N:: <i>PssrA-ssrA</i> , Chl <sup>R</sup>                                                                       | This study                           |
| pYX203   | JM110        | pNW33N, Chl <sup>R</sup>                                                                                            | This study                           |
| pYX240   | DH5 $\alpha$ | pNW33N::pG- <i>acoA</i> , Chl <sup>R</sup>                                                                          | This study                           |
| pYX241   | JM110        | pNW33N::pG- <i>acoA</i> , Chl <sup>R</sup>                                                                          | This study                           |
| pYX250   | DH5 $\alpha$ | pNW33N::pG- <i>yhjR</i> , Chl <sup>R</sup>                                                                          | This study                           |
| pYX251   | JM110        | pNW33N::pG- <i>yhjR</i> , Chl <sup>R</sup>                                                                          | This study                           |

Abbreviations for the antibiotic resistance genes: Kan, kanamycin; Str, Streptomycin; Chl, chloramphenicol.

**Supplementary Table S2: Primers used in This work.** (The underlined part represents the restriction-enzyme sites)

| Name                                             | Sequence (5' – 3')                                                                   | Built-in Restriction-Enzyme Sites | Usefulness                                                                                    |
|--------------------------------------------------|--------------------------------------------------------------------------------------|-----------------------------------|-----------------------------------------------------------------------------------------------|
| <i>ssrA</i> -gRNA-F<br><i>ssrA</i> -gRNA-R       | <u>TACGTGTGAAGAGCACATCCAAGT</u><br><u>AAACACTTGGATGTGCTCTTCACA</u>                   | <i>Bsa</i> I                      | gRNA of <i>ssrA</i> , for double crossing over mutant construction                            |
| <i>ssrA</i> -U-F<br><i>ssrA</i> -U-R             | <u>AAGGCCAACGAGGCC</u> AAAGACACTGCGGACCAAA<br>CCCGTATTTCCCTTAACTCCCACCGTCTCCATAC     | <i>Sfi</i> I                      | Upstream fragment of <i>ssrA</i> , for double crossing over mutant construction               |
| <i>ssrA</i> -D-F<br><i>ssrA</i> -D-R             | GGAGACGGTGGGAGTTAAGGGAAATACGGGAGAA<br><u>AAGGCCTTATTGGCC</u> CAATAAAGATGAGCGCAATA    | <i>Sfi</i> I                      | Downstream fragment of <i>ssrA</i> <i>ssrA</i> , for double crossing over mutant construction |
| <i>ssrA</i> -verify-F<br><i>ssrA</i> -verify-R   | AAATCCCTAAATTGTTGACC<br>TTCTGCAAGGAACCGAAAT                                          |                                   | Verifying the <i>ssrA</i> mutants                                                             |
| <i>ssrA</i> -33n-F<br><i>ssrA</i> -33n-R         | <u>AACTGCAGAGGC</u> ATAGTGCTTGATTCTG<br><u>CGGGATCC</u> GTATGGAGACGGTGGGAGT          | <i>Pst</i> I<br><i>Bam</i> HI     | Cloning <i>ssrA</i> in pNW33N for construction of the complementary strain                    |
| pG-gibson-F<br>pG-gibson-R                       | CCAAGCTTGCATGCCTGCAGGCTCCAGTATTCTGACATGG<br>TAATATCGCCTCCTATTGTAA                    |                                   | Cloning pG region in pNW33N                                                                   |
| <i>acoA</i> -gibson-F<br><i>acoA</i> -gibson-R   | TACAATAGGAGGCGATATTAATGAAATTGTTAAAACGAGA<br>AGCTCGGTACCCGGGGATCCTATGACTCTCGCCATCTCTT |                                   | Cloning the <i>acoA</i> gene in pNW33N                                                        |
| <i>yhjR</i> -gibson-F<br><i>yhjR</i> -gibson-R   | TACAATAGGAGGCGATATTAATGGATAATTTTAAATTAGA<br>AGCTCGGTACCCGGGGATCCAGACAAGGCTTTTCGCTTG  |                                   | Cloning the <i>yhjR</i> gene in pNW33N                                                        |
| 33n-verify-FP<br>33n-verify-RP                   | GAGCGAGGAAGCGGAAGAG<br>TTTGAAGGGCTGGCACGAC                                           |                                   | Verifying the over-expression plasmids                                                        |
| <i>gerPA</i> -gibson-F<br><i>gerPA</i> -gibson-R | TACAATAGGAGGCGATATTAATGCCGGCCATTGTCTGGAG<br>AGCTCGGTACCCGGGGATCCCTTTCATATGATTAACGGCC |                                   | Cloning <i>gerPA</i> gene to pNW33N                                                           |
| <i>ydgA</i> -gibson-F<br><i>ydgA</i> -gibson-R   | TACAATAGGAGGCGATATTAATGCCATATCAAATTAATAT<br>AGCTCGGTACCCGGGGATCCTTCTCCTTAAATTTGATTTG |                                   | Cloning <i>ydgA</i> gene to pNW33N                                                            |
| <i>yngJ</i> -gibson-FP                           | TACAATAGGAGGCGATATTAATGAATTTTGAGCTGACAAA                                             |                                   | Cloning <i>yngJ</i> gene to pNW33N                                                            |

|                |                                             |              |                                                                                   |
|----------------|---------------------------------------------|--------------|-----------------------------------------------------------------------------------|
| yngJ-gibson-RP | AGCTCGGTACCCGGGGATCCCCTCCTTTCTTAATGATAGG    |              |                                                                                   |
| yticB-gibson-F | TACAATAGGAGGCGATATTAATGAAAATACTCGTCACAGG    |              | Cloning <i>yticB</i> gene to pNW33N                                               |
| yticB-gibson-R | AGCTCGGTACCCGGGGATCCTTATCCCCCTGATACAGCG     |              |                                                                                   |
| yxbB-gibson-F  | TACAATAGGAGGCGATATTAATGATTACGGCTGAAGAATG    |              | Cloning <i>yxbB</i> gene to pNW33N                                                |
| yxbB-gibson-R  | AGCTCGGTACCCGGGGATCCATTGATCATTACAATGCACC    |              |                                                                                   |
| acoA-gRNA-F    | <u>TACGAACCAAGGTACCTTCCACGA</u>             | <i>Bsa</i> I | gRNA of <i>acoA</i> , for double crossing over mutant construction                |
| acoA-gRNA-R    | <u>AAACTCGTGGAAGGTACCTTGGTT</u>             |              |                                                                                   |
| acoA-U-F       | <u>AAGGCCTTATTGGCCCCGCTATCATCATACAAAG</u>   | <i>Sfi</i> I | Upstream fragment of <i>acoA</i> , for double crossing over mutant construction   |
| acoA-U-R       | GCTGACACGCTGTTCAAGCCGTAATAATCAGTCTTC        |              |                                                                                   |
| acoA-D-F       | ACTGATTTTACGGGCTGAACAGCGTGTCAAGCAATC        | <i>Sfi</i> I | Downstream fragment of <i>acoA</i> , for double crossing over mutant construction |
| acoA-D-R       | <u>AAGGCCTTATTGGCCAGCGACAAGCGCAGCAAT</u>    |              |                                                                                   |
| acoA-verify-F  | TTAGACGCCAGCGGGTTAT                         |              | Verifying the <i>acoA</i> mutants                                                 |
| acoA-verify-R  | ATGTGGTGCGGACGGTAAT                         |              |                                                                                   |
| yhjR-gRNA-F    | <u>TACGACACATCATGCCGAAACAAA</u>             | <i>Bsa</i> I | gRNA of <i>yhjR</i> , for double crossing over mutant construction                |
| yhjR-gRNA-R    | <u>AAACTTTGTTTCGGCATGATGTGT</u>             |              |                                                                                   |
| yhjR-U-F       | <u>AAGGCCTTATTGGCCGGCATGTTCAAGTATTGTCTG</u> | <i>Sfi</i> I | Upstream fragment of <i>yhjR</i> , for double crossing over mutant construction   |
| yhjR-U-R       | ACTATCCCTATCCGGCACGCTGTCTGGTTCCTAT          |              |                                                                                   |
| yhjR-D-F       | GAACCAGACAGCGTGCCGGATAGGGATAGTAGCT          | <i>Sfi</i> I | Downstream fragment of <i>yhjR</i> , for double crossing over mutant construction |
| yhjR-D-R       | <u>AAGGCCAACGAGGCCGCAGGCGGTAATAGGTTTT</u>   |              |                                                                                   |
| yhjR-verify-F  | GCTTGATGAAGAGGGATGG                         |              | Verifying the <i>yhjR</i> mutants                                                 |
| yhjR-verify-R  | TCCGCAGGAGCATTGTGTAC                        |              |                                                                                   |
| skfA-gRNA-F    | <u>TACGACTTCGATTGTGAAAGCTGC</u>             | <i>Bsa</i> I | gRNA of <i>skfA</i> , for double crossing over mutant construction                |
| skfA-gRNA-R    | <u>AAACGCAGCTTTCACAATCGAAGT</u>             |              |                                                                                   |
| skfA-U-F       | <u>AAGGCCTTATTGGCCACCTGGGTGGTGCCTTAG</u>    | <i>Sfi</i> I | Upstream fragment of <i>skfA</i> , for double crossing over mutant construction   |
| skfA-U-R       | CCCTATTCTCAAATGGCTCCCATGCGATACGATA          |              |                                                                                   |
| skfA-D-F       | GTATCGCATGGGAGCCATTTGAGAATAGGGAGTT          | <i>Sfi</i> I | Downstream fragment of <i>skfA</i> , for double crossing over mutant construction |
| skfA-D-R       | <u>AAGGCCAACGAGGCCCAATTATGTTCAAGCGATC</u>   |              |                                                                                   |

|                                                |                                                                                   |              |                                                                                   |
|------------------------------------------------|-----------------------------------------------------------------------------------|--------------|-----------------------------------------------------------------------------------|
| <i>skfA</i> -verify-F<br><i>skfA</i> -verify-R | TTGCTCTGTTTCCGTTGTC<br>CGTAAATGGATGGGCACTA                                        |              | Verifying the <i>skfA</i> mutants                                                 |
| <i>sinR</i> -gRNA-F<br><i>sinR</i> -gRNA-R     | <u>TACGCG</u> AAAAAGTCTCCGCTGTTC<br><u>AAACG</u> AACAGCGGAGACTTTTTCG              | <i>Bsa</i> I | gRNA of <i>sinR</i> , for double crossing over mutant construction                |
| <i>sinR</i> -U-F<br><i>sinR</i> -U-R           | <u>AAGGCCAACGAGGCC</u> GAACCGCCCTTTCTACTGG<br>AGTGCCTCTGCTCAGTGTTCATCACCTTCCTTGTG | <i>Sfi</i> I | Upstream fragment of <i>sinR</i> , for double crossing over mutant construction   |
| <i>sinR</i> -D-F<br><i>sinR</i> -D-R           | AGGAAGGTGATGACACTGAGCAGAGGCACTAACT<br><u>AAGGCCTTATTGGCC</u> ATACAAAGGACAGCACCAT  | <i>Sfi</i> I | Downstream fragment of <i>sinR</i> , for double crossing over mutant construction |
| <i>sinR</i> -verify-F<br><i>sinR</i> -verify-R | TGCTTCACCATTTTCACCTAT<br>GTAAAACCGCTCCTGAATAT                                     |              | Verifying the <i>sinR</i> mutants                                                 |

**Supplementary Table S3: The most up-regulated genes comparing TM with WT**

| Gene ID     | Gene name    | Function                                                        | log <sub>2</sub> (fold change) |          |          |
|-------------|--------------|-----------------------------------------------------------------|--------------------------------|----------|----------|
|             |              |                                                                 | TM vs WT                       | MB vs TM | MB vs WT |
| EJJ34_15785 | <i>lrgA</i>  | Antiholin-like protein LrgA                                     | <b>6.90</b>                    | -2.65    | 4.21     |
| EJJ34_15780 | <i>lrgB</i>  | Antiholin-like protein LrgB                                     | <b>5.95</b>                    | -1.82    | 4.10     |
| EJJ34_08550 | <i>pyrB</i>  | Aspartate carbamoyltransferase                                  | <b>5.78</b>                    | -2.84    | 2.89     |
| EJJ34_08560 | <i>pyrAA</i> | Carbamoyl-phosphate synthase<br>Pyrimidine-specific small chain | <b>5.03</b>                    | -3.61    | 1.38     |
| EJJ34_08555 | <i>pyrC</i>  | Dihydroorotase                                                  | <b>4.93</b>                    | -3.02    | 1.86     |
| EJJ34_22095 | <i>yybN</i>  | DUF2712 domain-containing<br>protein                            | <b>4.84</b>                    | -2.48    | 2.32     |
| EJJ34_05180 | <i>cspB</i>  | Cold-shock protein CspB                                         | <b>4.82</b>                    | -3.31    | 1.46     |
| EJJ34_08570 | <i>pyrK</i>  | Dihydroorotate oxidase B electron<br>transfer subunit           | <b>4.64</b>                    | -3.64    | —        |
| EJJ34_08565 | <i>carB</i>  | Carbamoyl-phosphate synthase<br>pyrimidine-specific large chain | <b>4.62</b>                    | -3.72    | —        |
| EJJ34_08580 | <i>pyrF</i>  | Orotidine-5'-phosphate<br>decarboxylase                         | <b>4.60</b>                    | -4.10    | —        |
| EJJ34_17300 | <i>maeN</i>  | Na <sup>+</sup> -malate symporter                               | <b>4.60</b>                    | -4.51    | —        |
| EJJ34_08585 | <i>pyrE</i>  | Orotate phosphoribosyltransferase                               | <b>4.41</b>                    | -3.31    | 1.06     |
| EJJ34_02035 | <i>hxlA</i>  | 3-hexulose-6-phosphate synthase                                 | <b>4.34</b>                    | -4.95    | —        |
| EJJ34_08575 | <i>pyrD</i>  | Dihydroorotate dehydrogenase                                    | <b>4.11</b>                    | -3.50    | —        |
| EJJ34_11405 | <i>yopT</i>  | Hypothetical protein                                            | <b>4.07</b>                    | -2.00    | 2.04     |
| EJJ34_11780 | <i>sunS</i>  | SunS family peptide S-<br>glycosyltransferase                   | <b>4.02</b>                    | -2.52    | 1.46     |
| EJJ34_22110 | <i>yybK</i>  | DUF2705 domain-containing<br>protein                            | <b>3.88</b>                    | -3.12    | —        |
| EJJ34_18065 | <i>yvzF</i>  | DUF3970 domain-containing<br>protein                            | <b>3.81</b>                    | -3.26    | —        |
| EJJ34_11505 | <i>yopB</i>  | XRE family transcriptional<br>regulator                         | <b>3.79</b>                    | —        | 3.75     |
| EJJ34_22105 | <i>yybL</i>  | Hypothetical protein                                            | <b>3.75</b>                    | -2.34    | 1.37     |

**Supplementary Table S4: The most down-regulated genes comparing TM to WT**

| Gene ID     | Gene name          | Function                                                       | log <sub>2</sub> (fold change) |          |          |
|-------------|--------------------|----------------------------------------------------------------|--------------------------------|----------|----------|
|             |                    |                                                                | TM vs WT                       | MB vs TM | MB vs WT |
| EJJ34_18365 | <i>ssrA</i>        | Transfer-messenger RNA<br>Acetoin:2%2C6-                       | <b>-15.20</b>                  | —        | -18.09   |
| EJJ34_04560 | <i>acoB</i>        | dichlorophenolindophenol oxidoreductase<br>subunit beta        | <b>-8.89</b>                   | 9.72     | —        |
| EJJ34_19650 | <i>cotG</i>        | Spore coat protein G                                           | <b>-8.41</b>                   | 5.09     | -3.36    |
| EJJ34_05115 | <i>prkA</i>        | Protein PrkA                                                   | <b>-8.20</b>                   | 6.58     | -1.66    |
| EJJ34_12505 | <i>spoIVA</i>      | Stage IV sporulation protein A && -                            | <b>-7.86</b>                   | 6.75     | -1.14    |
| EJJ34_15225 | <i>safA</i>        | Spore coat assembly protein SafA                               | <b>-7.78</b>                   | 6.82     | —        |
| EJJ34_06265 | <i>carA</i>        | Carbamoyl-phosphate synthase arginine-<br>specific small chain | <b>-7.71</b>                   | 3.85     | -3.90    |
| EJJ34_15220 | <i>coxA</i>        | Sporulation cortex protein CoxA                                | <b>-7.61</b>                   | 7.56     | —        |
| EJJ34_05910 | <i>ntdB</i>        | Kanosamine-6-phosphate phosphatase                             | <b>-7.59</b>                   | 6.31     | -1.33    |
| EJJ34_05305 | <i>yhdB</i>        | Hypothetical protein                                           | <b>-7.59</b>                   | 8.07     | —        |
| EJJ34_05500 | <i>sspB</i>        | Small%2C acid-soluble spore protein B                          | <b>-7.59</b>                   | 7.15     | —        |
| EJJ34_16790 | <b><i>ytcB</i></b> | NAD-dependent epimerase/dehydratase<br>family protein          | <b>-7.54</b>                   | 8.62     | 1.04     |
| EJJ34_05905 | <i>ntdC</i>        | Glucose-6-phosphate 3-dehydrogenase                            | <b>-7.48</b>                   | 6.38     | -1.15    |
| EJJ34_05790 | <i>aprE</i>        | Subtilisin E                                                   | <b>-7.46</b>                   | 7.61     | —        |
| EJJ34_06540 | <i>cotZ</i>        | Spore coat protein Z                                           | <b>-7.45</b>                   | 7.86     | —        |
| EJJ34_06270 | <i>carB</i>        | Carbamoyl-phosphate synthase arginine-<br>specific large chain | <b>-7.44</b>                   | 3.93     | -3.55    |
| EJJ34_07915 | <i>yknT</i>        | Sporulation protein cse15                                      | <b>-7.43</b>                   | 7.14     | —        |
| EJJ34_06570 | <i>yjzK</i>        | Hypothetical protein<br>Acetoin:2%2C6-                         | <b>-7.43</b>                   | 7.23     | —        |
| EJJ34_04555 | <b><i>acoA</i></b> | dichlorophenolindophenol oxidoreductase<br>subunit alpha       | <b>-7.38</b>                   | 10.82    | 3.39     |
| EJJ34_03975 | <i>cotJA</i>       | Protein CotJA                                                  | <b>-7.34</b>                   | 7.60     | —        |

**Supplementary Table S5: The most up-regulated genes comparing MB with TM**

| Gene ID     | Gene name        | Function                                                                           | log <sub>2</sub> (fold change) |              |          |
|-------------|------------------|------------------------------------------------------------------------------------|--------------------------------|--------------|----------|
|             |                  |                                                                                    | TM vs WT                       | MB vs TM     | MB vs WT |
| EJJ34_04555 | <i>acoA</i>      | Acetoin:2%2C6-dichlorophenolindophenol oxidoreductase subunit alpha                | -7.38                          | <b>10.82</b> | 3.39     |
| EJJ34_04560 | <i>acoB</i>      | Acetoin:2%2C6-dichlorophenolindophenol oxidoreductase subunit beta                 | -8.89                          | <b>9.72</b>  | —        |
| EJJ34_16790 | <i>ytcB</i>      | NAD-dependent epimerase/dehydratase family protein                                 | -7.54                          | <b>8.62</b>  | 1.04     |
| EJJ34_05305 | <i>yhdB</i>      | Hypothetical protein                                                               | -7.59                          | <b>8.07</b>  | —        |
| EJJ34_04565 | <i>acoC</i>      | Dihydrolipoyllysine-residue acetyltransferase component of acetoin cleaving system | -7.31                          | <b>8.01</b>  | —        |
| EJJ34_04570 | <i>lpdA/acoL</i> | Dihydrolipoyl dehydrogenase                                                        | -6.82                          | <b>7.95</b>  | 1.09     |
| EJJ34_06540 | <i>cotZ</i>      | Spore coat protein Z                                                               | -7.45                          | <b>7.86</b>  | —        |
| EJJ34_05790 | <i>aprE</i>      | Subtilisin E                                                                       | -7.46                          | <b>7.61</b>  | —        |
| EJJ34_03975 | <i>cotJA</i>     | Protein CotJA                                                                      | -7.34                          | <b>7.60</b>  | —        |
| EJJ34_15220 | <i>coxA</i>      | Sporulation cortex protein CoxA                                                    | -7.61                          | <b>7.56</b>  | —        |
| EJJ34_06000 | <i>gerPA</i>     | Germination protein GerPA                                                          | -5.51                          | <b>7.32</b>  | 1.76     |
| EJJ34_19910 | <i>spoIIQ</i>    | M23 family metallopeptidase                                                        | -7.25                          | <b>7.26</b>  | —        |
| EJJ34_06545 | <i>cotY</i>      | Spore coat protein Y                                                               | -6.80                          | <b>7.24</b>  | —        |
| EJJ34_06570 | <i>yjzK</i>      | Hypothetical protein                                                               | -7.43                          | <b>7.23</b>  | —        |
| EJJ34_05500 | <i>sspB</i>      | Small%2C acid-soluble spore protein B                                              | -7.59                          | <b>7.15</b>  | —        |
| EJJ34_07915 | <i>yknT</i>      | Sporulation protein cse15                                                          | -7.43                          | <b>7.14</b>  | —        |
| EJJ34_09995 | <i>yngJ</i>      | Acyl-CoA dehydrogenase                                                             | -5.62                          | <b>7.12</b>  | 1.46     |
| EJJ34_03220 | <i>ydgA</i>      | Spore germination protein                                                          | -5.68                          | <b>6.94</b>  | 1.22     |
| EJJ34_10870 | <i>yodT</i>      | Aspartate aminotransferase family protein                                          | -6.84                          | <b>6.86</b>  | —        |
| EJJ34_13355 | <i>spoIIIAA</i>  | Stage III sporulation protein AA                                                   | -7.13                          | <b>6.84</b>  | —        |

**Supplementary Table S6: The most down-regulated genes comparing MB with TM**

| Gene ID     | Gene name          | Function                                                         | log <sub>2</sub> (fold change) |              |          |
|-------------|--------------------|------------------------------------------------------------------|--------------------------------|--------------|----------|
|             |                    |                                                                  | TM vs WT                       | MB vs TM     | MB vs WT |
| EJJ34_02035 | <i>hxlA</i>        | 3-hexulose-6-phosphate synthase                                  | 4.34                           | <b>-4.95</b> | —        |
| EJJ34_17300 | <i>maeN</i>        | Na <sup>+</sup> -malate symporter                                | 4.60                           | <b>-4.51</b> | —        |
| EJJ34_02030 | <b><i>hxlB</i></b> | 6-phospho-3-hexuloisomerase                                      | 2.85                           | <b>-4.19</b> | -1.37    |
| EJJ34_08580 | <i>pyrF</i>        | Orotidine-5'-phosphate decarboxylase                             | 4.60                           | <b>-4.10</b> | —        |
| EJJ34_08565 | <i>carB</i>        | Carbamoyl-phosphate synthase<br>pyrimidine-specific large chain  | 4.62                           | <b>-3.72</b> | —        |
| EJJ34_20570 | <b><i>rocA</i></b> | L-glutamate gamma-semialdehyde<br>dehydrogenase                  | 1.73                           | <b>-3.65</b> | -1.97    |
| EJJ34_08570 | <i>pyrK</i>        | Dihydroorotate oxidase B electron<br>transfer subunit            | 4.64                           | <b>-3.64</b> | —        |
| EJJ34_08560 | <i>pyrAA</i>       | Carbamoyl-phosphate synthase<br>pyrimidine-specific small chain  | 5.03                           | <b>-3.61</b> | 1.38     |
| EJJ34_10765 | <i>yoyD</i>        | DUF3311 domain-containing protein                                | 3.14                           | <b>-3.59</b> | —        |
| EJJ34_08575 | <i>pyrD</i>        | Dihydroorotate dehydrogenase                                     | 4.11                           | <b>-3.50</b> | —        |
| EJJ34_05180 | <i>cspB</i>        | Cold-shock protein CspB                                          | 4.82                           | <b>-3.31</b> | 1.46     |
| EJJ34_08585 | <i>pyrE</i>        | Orotate phosphoribosyltransferase                                | 4.41                           | <b>-3.31</b> | 1.06     |
| EJJ34_18065 | <i>yvzF</i>        | DUF3970 domain-containing protein                                | 3.81                           | <b>-3.26</b> | —        |
| EJJ34_22110 | <i>yybK</i>        | DUF2705 domain-containing protein                                | 3.88                           | <b>-3.12</b> | —        |
| EJJ34_20950 | <i>dltX</i>        | Teichoic acid D-Ala incorporation-<br>associated protein DltX    | 3.33                           | <b>-3.04</b> | —        |
| EJJ34_08555 | <i>pyrC</i>        | Dihydroorotase                                                   | 4.93                           | <b>-3.02</b> | 1.86     |
| EJJ34_03485 | <i>groES</i>       | Co-chaperone GroES                                               | 2.82                           | <b>-3.02</b> | —        |
| EJJ34_08030 | <i>abh</i>         | AbrB/MazE/SpoVT family DNA-<br>binding domain-containing protein | 2.61                           | <b>-2.98</b> | —        |
| EJJ34_05480 | <i>yheI</i>        | Multidrug resistance ABC transporter<br>ATP-binding/permease     | 3.50                           | <b>-2.94</b> | —        |
| EJJ34_08120 | <i>yktA</i>        | UPF0223 family protein                                           | 3.31                           | <b>-2.92</b> | —        |



**Supplementary Table S7: The most up-regulated genes comparing MB with WT**

| Gene ID     | Gene name          | Function                                              | log <sub>2</sub> (fold change) |          |             |
|-------------|--------------------|-------------------------------------------------------|--------------------------------|----------|-------------|
|             |                    |                                                       | TM vs WT                       | MB vs TM | MB vs WT    |
| EJJ34_22760 | -                  | Phage gp6-like head-tail connector protein            | —                              | 4.57     | <b>4.23</b> |
| EJJ34_15785 | <i>lrgA</i>        | Antiholin-like protein LrgA                           | 6.90                           | -2.65    | <b>4.21</b> |
| EJJ34_15780 | <i>lrgB</i>        | Antiholin-like protein LrgB                           | 5.95                           | -1.82    | <b>4.10</b> |
| EJJ34_15490 | -                  | tRNA-Arg                                              | —                              | 4.23     | <b>3.90</b> |
| EJJ34_16735 | -                  | Hypothetical protein                                  | —                              | —        | <b>3.88</b> |
| EJJ34_22560 | -                  | Thioredoxin                                           | —                              | 4.19     | <b>3.86</b> |
| EJJ34_11505 | <i>yopB</i>        | XRE family transcriptional regulator                  | 3.79                           | —        | <b>3.75</b> |
| EJJ34_11210 | <i>yorH</i>        | Hypothetical protein                                  | 2.39                           | 1.15     | <b>3.51</b> |
| EJJ34_05945 | <b><i>yhjR</i></b> | Spore coat protein                                    | -2.70                          | 6.15     | <b>3.40</b> |
|             |                    | acetoin:2%2C6-                                        |                                |          |             |
| EJJ34_04555 | <b><i>acoA</i></b> | Dichlorophenolindophenol oxidoreductase subunit alpha | -7.38                          | 10.82    | <b>3.40</b> |
| EJJ34_22800 | -                  | Phage terminase small subunit P27 family              | —                              | 3.73     | <b>3.40</b> |
| EJJ34_00515 | -                  | tRNA-Leu                                              | 2.74                           | —        | <b>3.19</b> |
| EJJ34_11320 | <i>yoqK</i>        | Hypothetical protein                                  | 2.16                           | 1.03     | <b>3.13</b> |
| EJJ34_20750 | <i>ywcE</i>        | Spore morphogenesis/ germination protein YwcE         | 1.95                           | 1.06     | <b>2.99</b> |
| EJJ34_07065 | <i>xkzB</i>        | Hypothetical protein                                  | 1.24                           | 1.73     | <b>2.90</b> |
| EJJ34_08550 | <i>pyrB</i>        | Aspartate carbamoyltransferase                        | 5.78                           | -2.84    | <b>2.89</b> |
| EJJ34_16870 | -                  | tRNA-Gly                                              | 3.25                           | —        | <b>2.81</b> |
| EJJ34_11435 | <i>yopN</i>        | Hypothetical protein                                  | 3.16                           | —        | <b>2.66</b> |
| EJJ34_21665 | <b><i>ymbB</i></b> | Class I SAM-dependent methyltransferase               | -1.97                          | 4.66     | <b>2.64</b> |
| EJJ34_02745 | <i>cmpA</i>        | Cortex morphogenetic protein CmpA                     | —                              | 2.91     | <b>2.59</b> |

**Supplementary Table S8: The most down-regulated genes comparing MB with WT**

| Gene ID     | Gene name   | Fuction                                                    | log <sub>2</sub> (fold change) |          |               |
|-------------|-------------|------------------------------------------------------------|--------------------------------|----------|---------------|
|             |             |                                                            | TM vs WT                       | MB vs TM | MB vs WT      |
| EJJ34_18365 | <i>ssrA</i> | Transfer-messenger RNA<br>Bifunctional ornithine           | -15.20                         | —        | <b>-18.09</b> |
| EJJ34_06250 | <i>argJ</i> | acetyltransferase/N-acetylglutamate synthase               | -5.94                          | 1.97     | <b>-4.01</b>  |
| EJJ34_06265 | <i>carA</i> | Carbamoyl-phosphate synthase arginine-specific small chain | -7.71                          | 3.85     | <b>-3.90</b>  |
| EJJ34_06245 | <i>argC</i> | N-acetyl-gamma-glutamyl-phosphate reductase                | -4.43                          | 0.61     | <b>-3.86</b>  |
| EJJ34_08145 | <i>yktD</i> | Class I SAM-dependent methyltransferase                    | -5.78                          | 1.98     | <b>-3.85</b>  |
| EJJ34_08175 | <i>ylaE</i> | Hypothetical protein                                       | -4.29                          | —        | <b>-3.76</b>  |
| EJJ34_06255 | <i>argB</i> | Acetylglutamate kinase                                     | -6.25                          | 2.53     | <b>-3.75</b>  |
| EJJ34_16065 | <i>argG</i> | Argininosuccinate synthase                                 | -5.51                          | 1.91     | <b>-3.65</b>  |
| EJJ34_06260 | <i>argD</i> | Acetylornithine transaminase                               | -5.97                          | 2.43     | <b>-3.59</b>  |
| EJJ34_06270 | <i>carB</i> | Carbamoyl-phosphate synthase arginine-specific large chain | -7.44                          | 3.93     | <b>-3.55</b>  |
| EJJ34_05735 | -           | Hypothetical protein                                       | -6.09                          | 2.63     | <b>-3.50</b>  |
| EJJ34_22210 | -           | Tetracycline resistance efflux system leader peptide       | —                              | -2.86    | <b>-3.50</b>  |
| EJJ34_09660 | <i>cotU</i> | Hypothetical protein                                       | -2.80                          | —        | <b>-3.39</b>  |
| EJJ34_17840 | <i>sspG</i> | Acid-soluble spore protein SspG                            | -4.60                          | 1.30     | <b>-3.38</b>  |
| EJJ34_19650 | <i>cotG</i> | Spore coat protein G                                       | -8.41                          | 5.09     | <b>-3.36</b>  |
| EJJ34_16060 | <i>argH</i> | Argininosuccinate lyase                                    | -5.62                          | 2.31     | <b>-3.34</b>  |
| EJJ34_17845 | <i>yurS</i> | Hypothetical protein                                       | -7.28                          | 4.09     | <b>-3.25</b>  |
| EJJ34_02205 | <i>yczN</i> | YjcZ family sporulation protein                            | -3.80                          | —        | <b>-2.99</b>  |
| EJJ34_14240 | <i>yqbH</i> | DUF3599 family protein                                     | —                              | -2.13    | <b>-2.99</b>  |
| EJJ34_09690 | <i>cotC</i> | Spore coat protein CotC                                    | -3.49                          | —        | <b>-2.78</b>  |

**Supplementary Table S9: The biofilm-related genes differentially expressed among strain WT, TM, and MB**

| Gene                      | Function/product                                             | log <sub>2</sub> (fold change) |          |          |
|---------------------------|--------------------------------------------------------------|--------------------------------|----------|----------|
|                           |                                                              | TM vs WT                       | MB vs TM | MB vs WT |
| Transcriptional regulator |                                                              |                                |          |          |
| <i>spo0A</i>              | Sporulation transcription factor Spo0A                       | —                              | —        | —        |
| <i>spo0B</i>              | Sporulation protein                                          | 1.56                           | -1.39    | —        |
| <i>kinA</i>               | PAS domain-containing protein                                | 1.18                           | —        | —        |
| <i>kinB</i>               | Two-component sensor histidine kinase                        | 1.84                           | —        | —        |
| <i>kinC</i>               | PAS domain-containing sensor histidine kinase                | 2.30                           | -1.64    | —        |
| <i>kinD</i>               | Two-component sensor histidine kinase                        | —                              | —        | —        |
| <i>kinE</i>               | Sporulation kinase                                           | —                              | —        | —        |
| <i>abh</i>                | AbrB/MazE/SpoVT family DNA-binding domain-containing protein | 2.61                           | -2.98    | —        |
| <i>abrB</i>               | Transition state regulatory protein AbrB                     | 2.81                           | -1.34    | 1.43     |
| <i>sinI</i>               | DNA-binding anti-repressor SinI                              | 2.50                           | -1.27    | 1.19     |
| <i>sinR</i>               | Transcriptional regulator                                    | —                              | -1.42    | —        |
| <i>sigH</i>               | RNA polymerase sigma-H factor                                | 1.27                           | -1.18    | —        |
| <i>ccpA</i>               | LacI family transcriptional regulator                        | —                              | —        | —        |
| <i>veg</i>                | Hypothetical protein                                         | 1.18                           | -1.16    | —        |
| <i>comER</i>              | Late competence protein                                      | -4.36                          | 4.14     | —        |
| <i>slrA</i>               | DNA-binding anti-repressor SinI                              | 2.48                           | -1.67    | —        |
| <i>slrR</i>               | helix-turn-helix domain-containing protein                   | 1.75                           | —        | 1.46     |
| <i>yvrH</i>               | DNA-binding response regulator                               | 1.33                           | —        | —        |
| <i>sigX</i>               | RNA polymerase sigma factor SigX                             | 2.58                           | -1.77    | —        |
| <i>degU</i>               | DNA-binding response regulator                               | —                              | —        | —        |
| <i>degS</i>               | Signal transduction histidine kinase                         | —                              | —        | —        |
| Extracellular matrix      |                                                              |                                |          |          |
| <i>tapA (yqxM)</i>        | TasA anchoring/assembly protein                              | 1.52                           | —        | 1.23     |
| <i>sipW</i>               | Signal peptidase I                                           | —                              | 1.91     | 1.35     |
| <i>tasA</i>               | Spore coat protein                                           | —                              | 2.29     | 1.45     |
| <i>bslA(yuaB)</i>         | Biofilm surface layer                                        | —                              | —        | —        |
| <i>epsA</i>               | Hypothetical protein                                         | 1.89                           | -1.48    | —        |
| <i>epsB</i>               | Tyrosine protein kinase                                      | —                              | 1.31     | —        |
| <i>epsC</i>               | Polysaccharide biosynthesis protein                          | —                              | —        | —        |
| <i>epsD</i>               | Glycosyl transferase                                         | —                              | —        | —        |
| <i>epsE</i>               | Glycosyl transferase                                         | 1.78                           | —        | 1.25     |

|             |                                                   |   |   |   |
|-------------|---------------------------------------------------|---|---|---|
| <i>epsF</i> | Glycosyl transferase                              | — | — | — |
| <i>epsG</i> | Membrane protein                                  | — | — | — |
| <i>epsH</i> | Glycosyl transferase                              | — | — | — |
| <i>epsI</i> | Pyruvyl transferase                               | — | — | — |
| <i>epsJ</i> | Glycosyl transferase                              | — | — | — |
| <i>epsK</i> | Membrane protein                                  | — | — | — |
| <i>epsL</i> | Sugar transferase                                 | — | — | — |
| <i>epsM</i> | Acetyltransferase                                 | — | — | — |
| <i>epsN</i> | Pyridoxal phosphate-dependent<br>aminotransferase | — | — | — |
| <i>epsO</i> | Pyruvyl transferase                               | — | — | — |

---

**Supplementary Table S10: The sporulation-related genes differentially expressed among strain WT, TM, and MB**

| Gene                                              | Function/product                                                   | log <sub>2</sub> fold change |          |          |
|---------------------------------------------------|--------------------------------------------------------------------|------------------------------|----------|----------|
|                                                   |                                                                    | TM vs WT                     | MB vs TM | MB vs WT |
| Key transcriptional regulators during sporulation |                                                                    |                              |          |          |
| <i>sigA</i>                                       | RNA polymerase sigma factor SigA                                   | —                            | —        | —        |
| <i>sigH</i>                                       | RNA polymerase sporulation sigma factor SigH                       | 1.26                         | -1.18    | —        |
| <i>sigF</i>                                       | RNA polymerase sporulation sigma factor SigF                       | -2.34                        | 2.22     | —        |
| <i>sigE</i>                                       | RNA polymerase sporulation sigma factor SigE                       | -3.20                        | 3.32     | —        |
| <i>sigG</i>                                       | RNA polymerase sporulation sigma factor SigG                       | -1.61                        | 1.87     | —        |
| <i>spo0A</i>                                      | Sporulation transcription factor Spo0A                             | —                            | —        | —        |
| <i>spo0B</i>                                      | Sporulation initiation phosphotransferase B                        | 1.56                         | -1.39    | —        |
| <i>spo0E</i>                                      | Aspartyl-phosphate phosphatase Spo0E family protein                | 1.29                         | —        | 1.10     |
| <i>spo0F</i>                                      | Sporulation initiation phosphotransferase Spo0F                    | —                            | —        | —        |
| <i>spo0M</i>                                      | Sporulation control protein Spo0M                                  | —                            | —        | -1.67    |
| <i>rsfA</i>                                       | Prespore-specific transcriptional regulator RsfA                   | -6.61                        | 6.51     | —        |
| <i>spoIIID</i>                                    | Stage III sporulation protein D                                    | -6.65                        | 6.65     | —        |
| <i>ylbO</i>                                       | RsfA family transcriptional regulator                              | -2.50                        | 1.22     | -1.33    |
| <i>spoVT</i>                                      | Stage V sporulation protein T                                      | 1.16                         | —        | —        |
| <i>gerE</i>                                       | Spore germination protein GerE                                     | -3.85                        | 3.56     | —        |
| <i>gerQ</i>                                       | Spore coat protein GerQ                                            | -7.09                        | 6.04     | -1.09    |
| <i>gerT</i>                                       | Germination protein GerT                                           | -5.12                        | 6.23     | 1.07     |
| Stage II sporulation genes                        |                                                                    |                              |          |          |
| <i>spoIIAA</i>                                    | Anti-sigma F factor antagonist;<br>Stage II sporulation protein AA | —                            | —        | —        |
| <i>spoIIAB</i>                                    | Anti-sigma F factor                                                | -1.98                        | 2.00     | —        |
| <i>spoIIB</i>                                     | Stage II sporulation protein B                                     | -3.72                        | 4.14     | —        |
| <i>spoIID</i>                                     | Stage II sporulation protein D                                     | -1.61                        | —        | —        |
| <i>spoIIE</i>                                     | Stage II sporulation protein E                                     | -2.45                        | 2.34     | —        |
| <i>spoIIGA</i>                                    | Stage II sporulation protein GA                                    | -1.51                        | 1.91     | —        |
| <i>spoIIM</i>                                     | Stage II sporulation protein M                                     | -3.53                        | 3.08     | —        |
| <i>spoIIP</i>                                     | Stage II sporulation protein P                                     | -2.65                        | 2.39     | —        |
| <i>spoIIQ</i>                                     | Stage II sporulation protein Q                                     | -7.25                        | 7.26     | —        |
| <i>spoIIR</i>                                     | Stage II sporulation protein R                                     | 1.15                         | —        | —        |
| Stage III sporulation genes                       |                                                                    |                              |          |          |
| <i>spoIIIAA</i>                                   | Stage III sporulation protein AA                                   | -7.13                        | 6.84     | —        |
| <i>spoIIAB</i>                                    | Stage III sporulation protein spoab                                | -4.32                        | 4.55     | —        |
| <i>spoIIAC</i>                                    | Stage III sporulation protein AC                                   | -3.47                        | 5.12     | 1.61     |

|                                   |                                                      |       |       |       |
|-----------------------------------|------------------------------------------------------|-------|-------|-------|
| <i>spoIIAD</i>                    | Stage III sporulation protein AD                     | -4.57 | 4.99  | —     |
| <i>spoIIAE</i>                    | Stage III sporulation protein AE                     | -3.24 | 3.64  | —     |
| <i>spoIIAF</i>                    | Stage III sporulation protein AF                     | -4.89 | 5.11  | —     |
| <i>spoIIAG</i>                    | Stage III sporulation protein AG                     | -4.69 | 4.55  | —     |
| <i>spoIIAH</i>                    | Stage III sporulation protein AH                     | -6.23 | 5.72  | —     |
| <i>spoIID</i>                     | Sporulation transcriptional regulator                | -6.65 | 6.65  | —     |
| <b>Stage IV sporulation genes</b> |                                                      |       |       |       |
| <i>spoIVA</i>                     | Stage IV sporulation protein A                       | -7.86 | 6.75  | -1.14 |
| <i>spoIVB</i>                     | Spoivb peptidase; stage IV sporulation protein B     | -3.05 | 3.38  | —     |
| <i>spoIVCA</i>                    | recombinase family protein                           | -1.02 | 1.14  | —     |
| <i>spoIVFA</i>                    | Stage IV sporulation protein FA                      | -1.88 | 1.03  | —     |
| <i>spoIVFB</i>                    | Stage IV sporulation protein FB                      | -1.29 | 1.16  | —     |
| <i>yqfD</i>                       | Stage IV sporulation protein                         | -2.06 | 1.44  | —     |
| <b>Stage V sporulation genes</b>  |                                                      |       |       |       |
| <i>spoVAA</i>                     | Stage V sporulation protein AA                       | -3.19 | 3.98  | —     |
| <i>spoVAB</i>                     | Stage V sporulation protein AB                       | -3.75 | 3.50  | —     |
| <i>spoVAC</i>                     | Stage V sporulation protein AC                       | -3.52 | 3.13  | —     |
| <i>spoVAD</i>                     | Stage V sporulation protein AD                       | -1.67 | 1.35  | —     |
| <i>spoVAE1</i>                    | Stage V sporulation protein AE                       | -3.22 | 2.68  | —     |
| <i>spoVAE2</i>                    | Stage V sporulation protein AE                       | —     | —     | —     |
| <i>spoVAF</i>                     | Stage V sporulation protein AF                       | -2.36 | 2.16  | —     |
| <i>spoVB</i>                      | Stage V sporulation protein B                        | -2.86 | 2.16  | —     |
| <i>spoVD</i>                      | Stage V sporulation protein D                        | —     | —     | —     |
| <i>spoVE</i>                      | Stage V sporulation protein E                        | -5.31 | 5.26  | —     |
| <i>spoVFA</i>                     | Dipicolinate synthase subunit A                      | 2.20  | -1.77 | —     |
| <i>spoVG</i>                      | Septation protein SpoVG                              | -2.61 | 3.18  | —     |
| <i>spoVK</i>                      | Stage V sporulation protein K                        | —     | —     | —     |
| <i>spoVM</i>                      | Stage V sporulation protein M                        | -5.24 | 4.31  | —     |
| <i>spoVR</i>                      | Stage V sporulation protein SpoVR                    | —     | —     | —     |
| <i>spoVS</i>                      | Stage V sporulation protein SpoVS                    | 1.16  | —     | —     |
| <i>spoVT</i>                      | Stage V sporulation protein T                        | -3.19 | 3.98  | —     |
| <b>Stage VI sporulation genes</b> |                                                      |       |       |       |
| <i>spoVID</i>                     | LysM peptidoglycan-binding domain-containing protein | -6.23 | 5.35  | —     |
| <i>spoVIF</i>                     | Sporulation-specific transcription factor            | -7.31 | 6.20  | -1.15 |

**Supplementary Table S11: The expression of genes spontaneously mutated in the MB strain**

| Gene ID     | Gene name    | Fuction                                      | log <sub>2</sub> (fold change) |          |          |
|-------------|--------------|----------------------------------------------|--------------------------------|----------|----------|
|             |              |                                              | TM vs WT                       | MB vs TM | MB vs WT |
| EJJ34_18080 | <i>gerAC</i> | Germination protein A3                       | —                              | 1.74     | —        |
| EJJ34_15400 | <i>hemA</i>  | Glutamyl-tRNA reductase                      | —                              | —        | —        |
| EJJ34_09320 | <i>mutS</i>  | DNA mismatch repair protein MutS             | —                              | -1.15    | -1.01    |
| EJJ34_12435 | <i>trpC</i>  | Indole-3-glycerol phosphate synthase<br>TrpC | -3.12                          | 2.94     | —        |
| EJJ34_18140 | <i>yvrD</i>  | SDR family oxidoreductase                    | —                              | —        | —        |

**Supplementary Table S12: The expression of genes related to secondary metabiotic products in strain WT, TM, and MB**

| Gene ID     | Gene name   | Fuction                                                                                | log <sub>2</sub> (fold change) |          |          |
|-------------|-------------|----------------------------------------------------------------------------------------|--------------------------------|----------|----------|
|             |             |                                                                                        | TM vs WT                       | MB vs TM | MB vs WT |
| EJJ34_01215 | <i>skfA</i> | Sporulation killing factor                                                             | -5.87                          | 5.82     | —        |
| EJJ34_01220 | <i>skfB</i> | Sporulation killing factor system radical SAM maturase                                 | -3.62                          | 5.43     | 1.78     |
| EJJ34_01225 | <i>skfC</i> | CPBP family intramembrane metalloprotease                                              | -1.56                          | 2.37     | —        |
| EJJ34_11790 | <i>sunT</i> | SPBc2 prophage-derived Sublancin-168-processing and transport ATP-binding protein SunT | 3.62                           | -2.24    | 1.33     |
| EJJ34_19115 | <i>cypX</i> | Cytochrome P450%2C cyclodipeptide synthase-associated                                  | -2.15                          | 1.90     | —        |
| EJJ34_19120 | <i>yvmC</i> | cyclo(L-leucyl-L-leucyl) synthase                                                      | -1.81                          | 1.76     | —        |
| EJJ34_10050 | <i>ppsA</i> | Non-ribosomal peptide synthetase                                                       | -2.17                          | 1.20     | -1.01    |
| EJJ34_10045 | <i>ppsB</i> | Plipastatin synthase subunit B                                                         | -2.47                          | 1.55     | —        |
| EJJ34_10025 | <i>ppsD</i> | Plipastatin synthase subunit D                                                         | -2.18                          | —        | -1.31    |
| EJJ34_10020 | <i>ppsE</i> | Non-ribosomal peptide synthetase                                                       | -2.08                          | 1.53     | —        |
| EJJ34_09355 | <i>pksC</i> | Malonyl CoA-ACP transacylase                                                           | 1.36                           | —        | —        |
| EJJ34_09360 | <i>pksD</i> | Acyltransferase domain-containing protein                                              | 1.89                           | -1.14    | —        |
| EJJ34_09395 | <i>pksJ</i> | Amino acid adenylation domain-containing protein                                       | -1.54                          | —        | —        |
| EJJ34_09410 | <i>pksN</i> | Amino acid adenylation domain-containing protein                                       | -1.73                          | —        | -1.13    |
| EJJ34_09415 | <i>pksR</i> | Methyltransferase                                                                      | -2.34                          | —        | -1.57    |



## Reference

1. Shannon, P.; Markiel, A.; Ozier, O.; Baliga, N.S.; Wang, J.T.; Ramage, D.; Amin, N.; Schwikowski, B.; Ideker, T. Cytoscape: a software environment for integrated models of biomolecular interaction networks. *Genome Res.* **2003**, *13*, 2498-504.
